# Supplementary material
Source: publisher figshare collection journal article supplement (https://rs.figshare.com/ndownloader/files/16257230)
Supplement: Supplementary file 1 [file 16257230]

**ELECTRONIC SUPPLEMENTARY MATERIAL:**

**Schumm, Edie, et al. Common latitudinal gradients in functional richness and functional evenness across marine and terrestrial systems**

**Global bird species functional assignments**

Bird functional assignments are based on those of Wilman et al. (2014)—a database of bird species’ proportionate use of diet and foraging substratum categories. Wilman et al. (2014) compiled this database using expert descriptions in the literature and regional bird guides, along with details of individual bird species ecology from *The Handbook of the Birds of the World* (del Hoyo et al. 1992-2011). Other papers have already made use of these species-level data in studies of global bird diversity (e.g. Şekercioğlu et al. 2004, Kissling et al. 2012). Diet and foraging stratum are important dimensions of bird species’ ecological roles, analogous to feeding mode and substratum relationships previously employed by Berke et al. (2014) and Edie et al. (2018a) to classify bivalves into discrete functional groups. We therefore use bird diet and foraging substratum as our two principal axes to maximize the comparison between bird and bivalve functional diversity in discrete categories.

Species that use more than one diet type or foraging stratum were classified into discrete categories using proportionate cutoffs of 80%. The definition of generalism as <80% occupancy of any category was driven by the results of Burin et al. (2016) who used these same data and also asked how to designate diet specialization vs. generalism. They showed that species with 80% or higher occupancy of a diet category represent a discretely different avifauna (as quantified by Shannon diversity indices) than species obtained using 50%, 60%, or 70% cutoffs (Burin et al. 2016). Species with proportional-use data for either foraging or diet that was tagged as low-quality or interpolated based on genus- or family-level traits (n=987 species) were omitted. Including these data sometimes led to impossible functional combinations (e.g. fish-eating ground-forager). Specific decisions to split or combine categories of diet or feeding substratum are listed below:

- **Feeding axis:** We chose to split the invertebrate + plant material and invertebrate + nectar categories, and to keep invertebrate + plant material as a single category. The herbivory category of Wilman et al. (2014) includes a wide range of plant parts that is here lumped with granivory and frugivory, as in other works (e.g. Bennett and Owens 2002). This may be further justified by the high frequency of evolutionary transition between herbivory, granivory and frugivory (Burin et al. 2016); 2) Nectar and/or pollen as a substantial component of the diet is kept separate because of the specialized nutritional and physiological requirements, and morphological adaptations (Gartrell 2000). Species that used more than one category were assigned to invertebrates + plant materials if they consume >0% inverts and >0% of either fruits, seeds, or other plants, and invertebrates + plants combined make up >50% of diet and to nectar + invertebrates if both nectar and invertebrate consumption is >0%. All species with vertebrate, invertebrate and plant diet were assigned as ‘Generalist omnivore’; all vertebrate and plant multi-use species as ‘Generalist carnivore’ and all strictly herbivorous species feeding on fruits, seeds, and other plants (forbs, etc.) as ‘Generalist herbivore’.
- **Foraging substrate axis:** We classed 100% aquatic foragers to one of two categories based on the binary ‘Pelagic Specialist’ category included in the Wilman et al. (2014) dataset. Semi-aquatic species are those that are partially aquatic foragers but also use one or more terrestrial foraging substrata. Strictly terrestrial multi-substrate species were split according to whether or not they forage on the ground. Aerial foragers are those with >60% aerial foraging.
- **Other plant resource (i.e. not fruits and seeds):** this category includes grass, ground vegetation, seedlings, weeds, lichen, moss, small plants, reeds, cultivated crops, forbs, vegetables, fungi, roots, tubers, legumes, bulbs, leaves, above ground vegetation, twigs, bark, shrubs, herbs, shoots, aquatic vegetation, aquatic plants

**Contribution of nestedness to functional group beta diversity**

We used the “beta.pair” function from the *betapart* package in R (Baselga 2010) to calculate the pairwise Sorenson dissimilarity between functional group presence-absence data for global and regional latitudinal and longitudinal bands. The proportional contribution of nestedness to total dissimilarity was defined as the mean pairwise nestedness component of dissimilarity normalized to the total Sorenson dissimilarity. Values of 1 indicate that nestedness fully accounts for the total dissimilarity and values of 0 indicate that turnover fully accounts for the total dissimilarity (Baselga 2010).

**Comparing the effects of tropical and temperate climates on functional evenness**

The latitudinal gradient in species richness underlies, to some extent, the decline in functional evenness (Figure S6; Berke et al. 2014). Therefore, we compared the effects of tropical and temperate environments on functional evenness while controlling for the effect of species richness. The comparison proceeded as follows:

1. Sample a temperate grid cell at random (see designations in Figure S2).
2. Sample a tropical grid cell at random.
   1. If the species richness of the tropical grid cell exceeds that of the temperate grid cell, subsample the species list for the tropical grid cell without replacement to the species richness of the temperate grid cell.
   2. If the species richness of the tropical grid cell is less than that of the temperate grid cell, add the unique species from adjacent grid cells until the species richness of unique species is equivalent to that of the temperate grid cell.
3. Calculate the functional evenness of the temperate and subsampled tropical assemblages.
4. Repeat 10,000 times.

**Supplemental Figures and Tables**

**
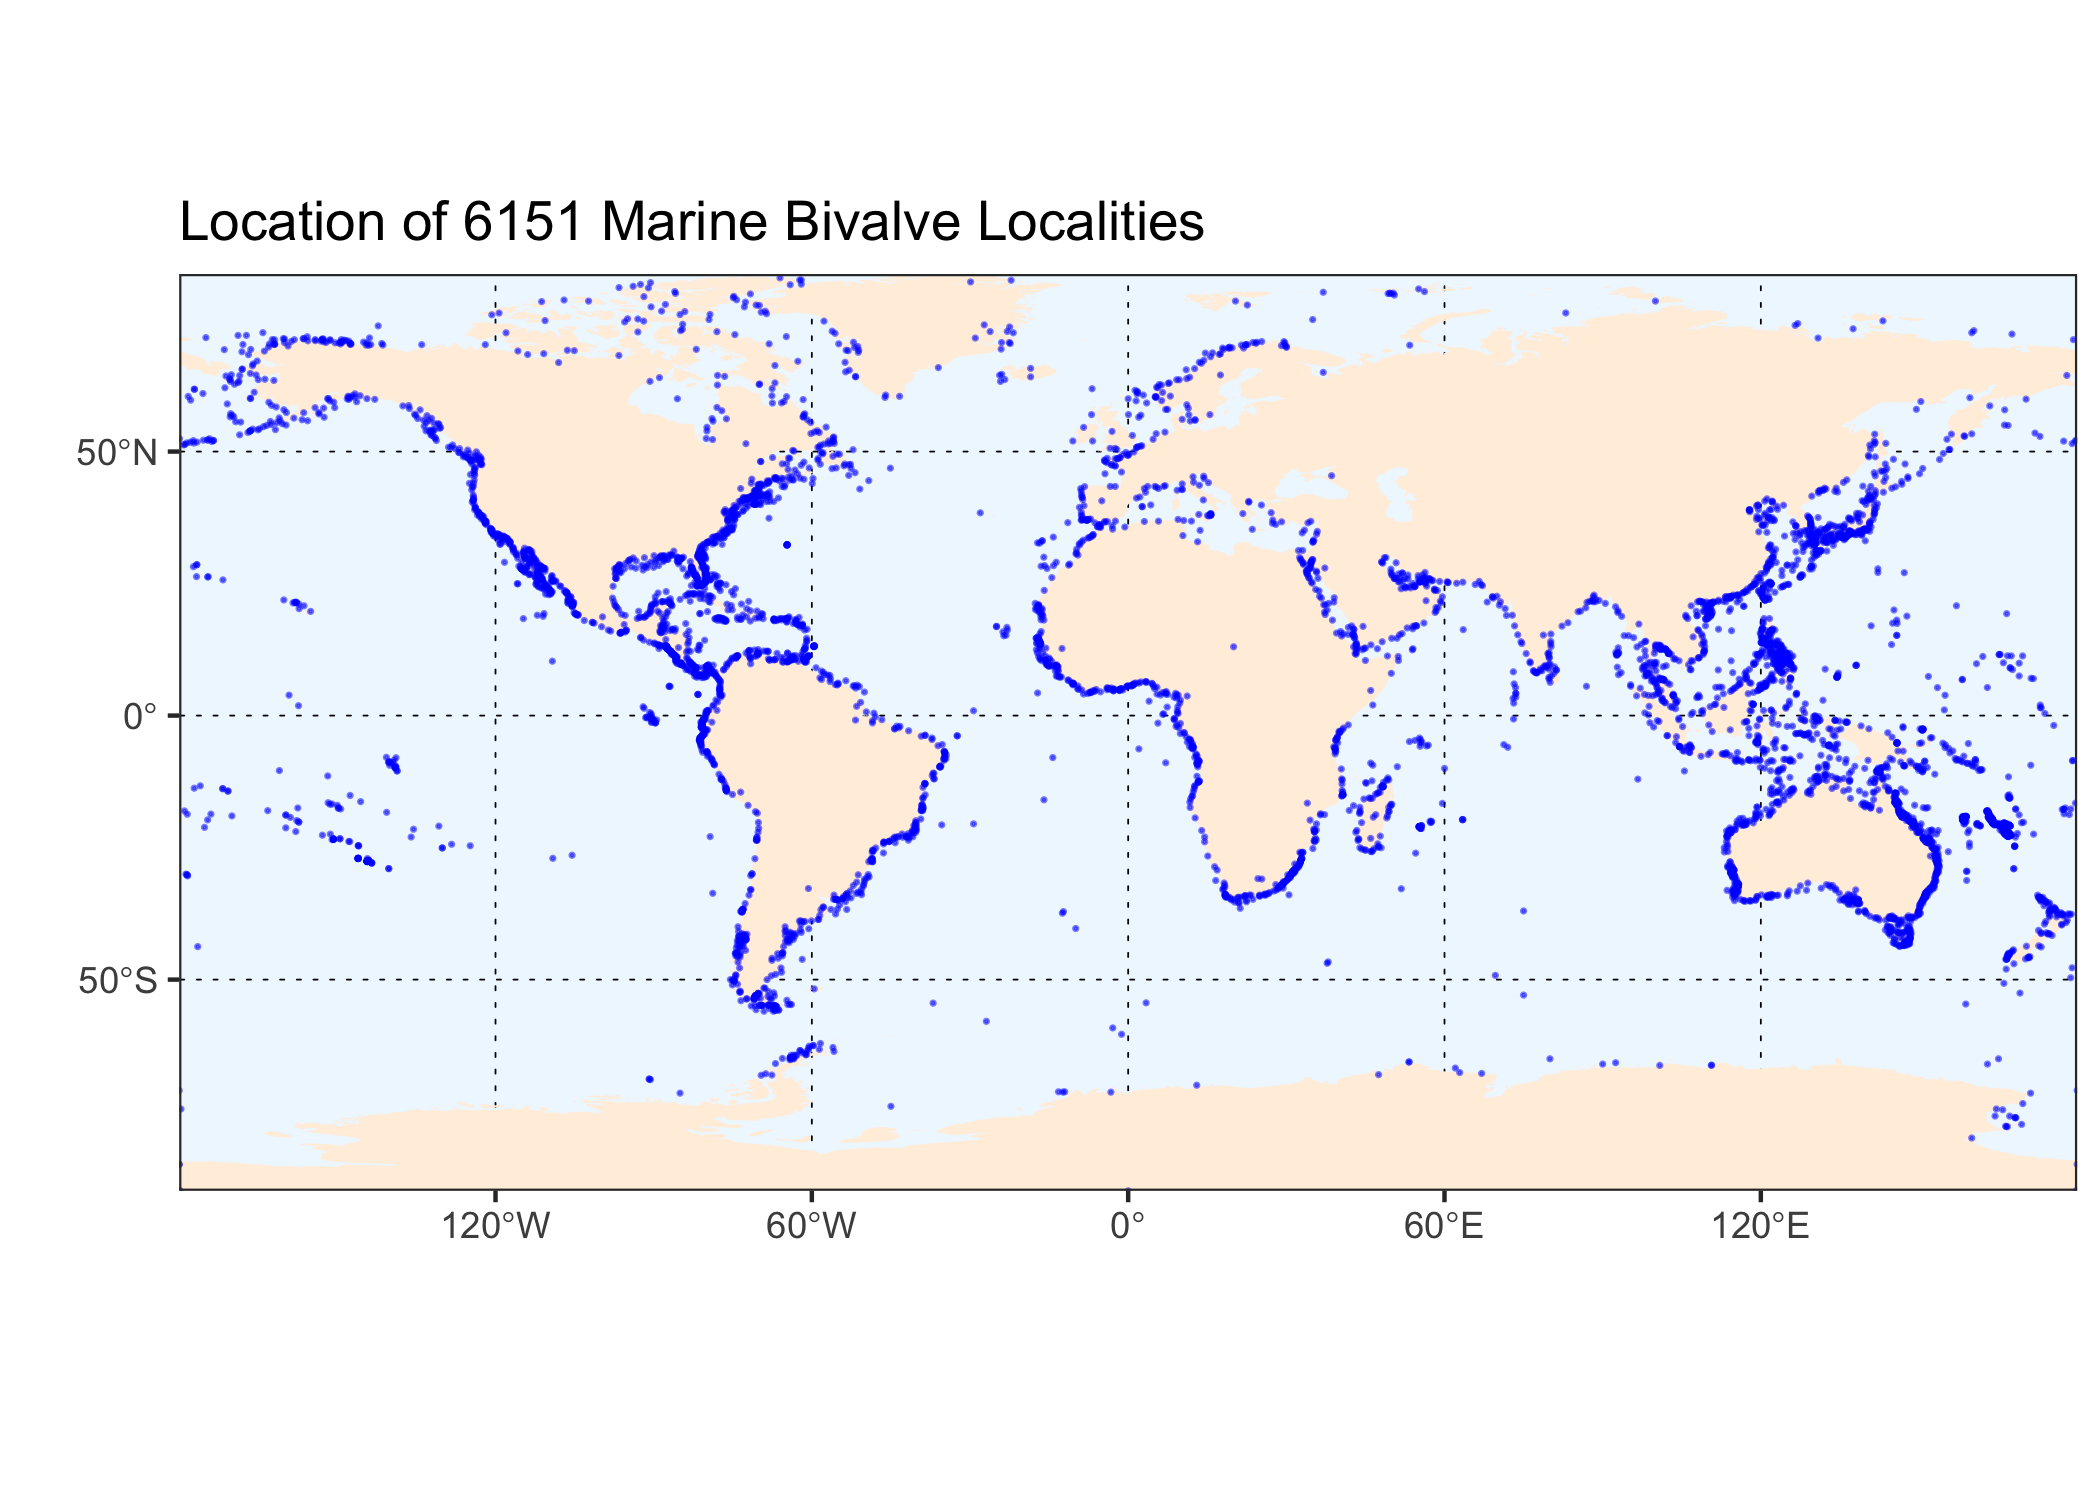
**

**Figure S1.** Global coverage of 6,151 point-localities for the 67,435 marine bivalve occurrences used in this study. Species ranges were inferred as convex hulls of points occurrences. For those species with point occurrences on both sides of the dateline, the convex hull was calculated with the prime-meridian re-centered on 180ºE.

**
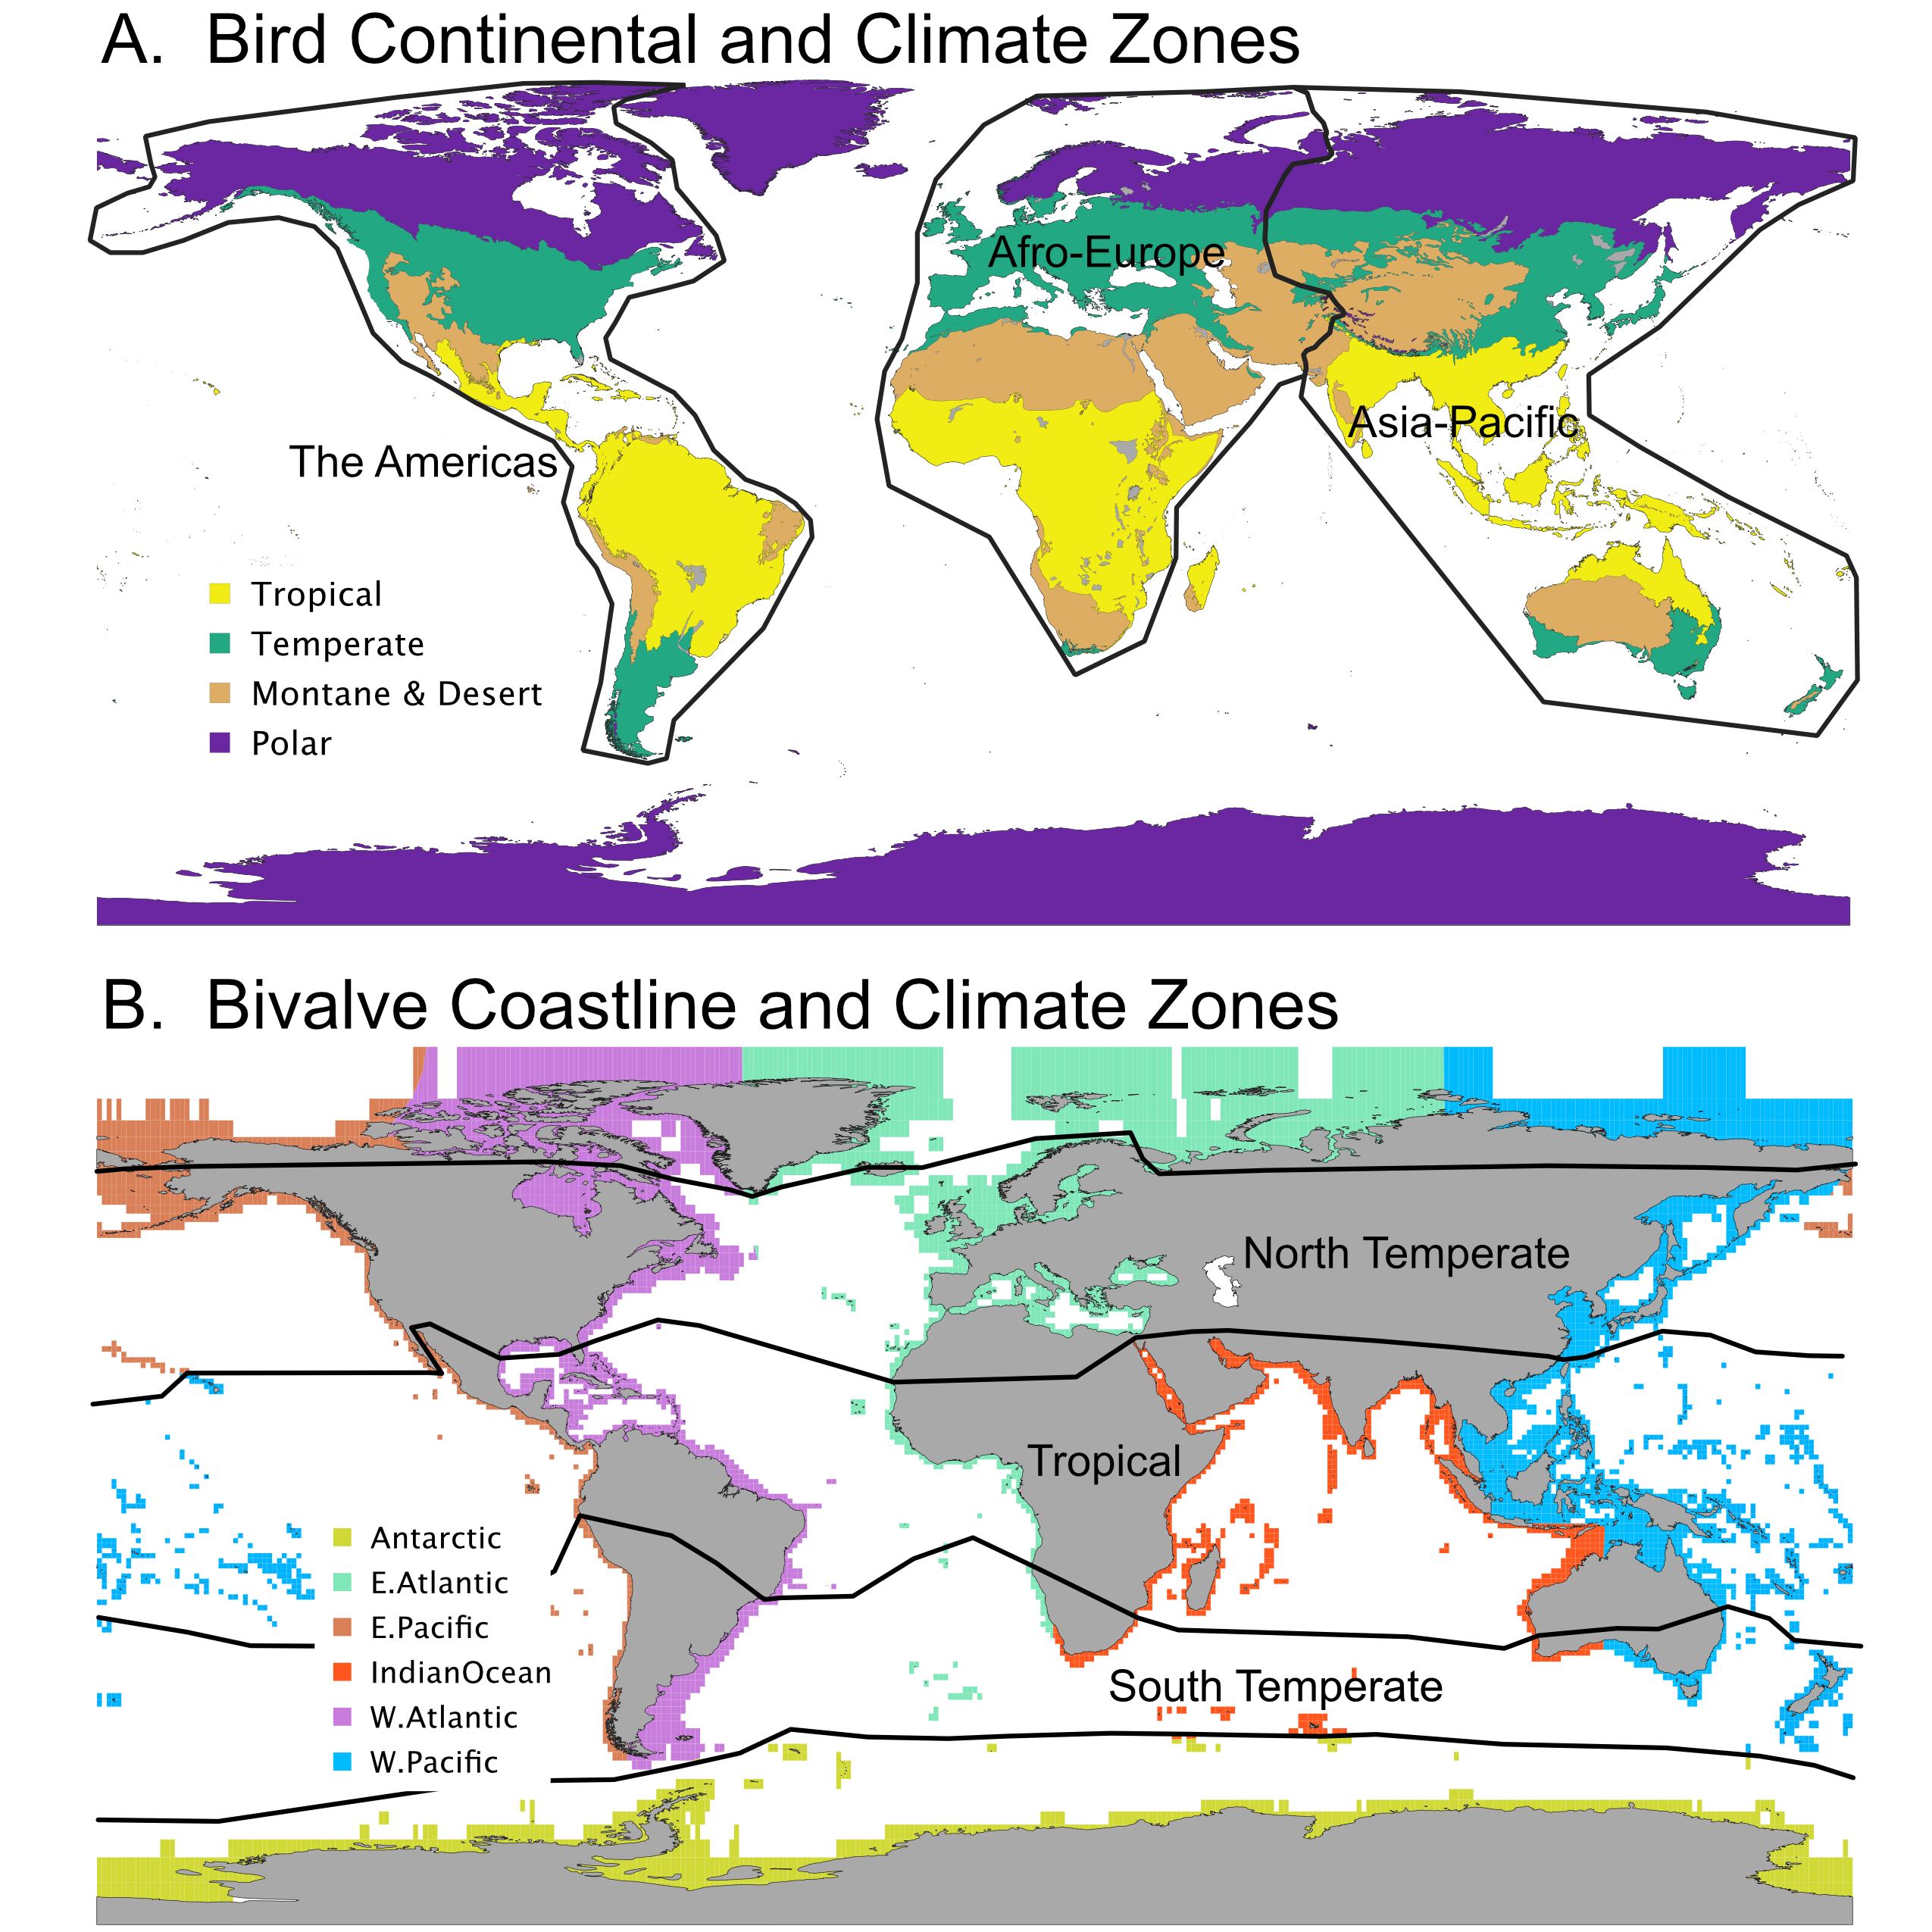
**

**Figure S2.** Boundaries of climate and geographic zones used for classifying bird and bivalve occurrence domains. A) The boundaries of climate zones and continental domains for bird occurrence data. B) The boundaries of climate zones and coastline domains for bivalve occurrence data.

**Figure S3.** Globaldistribution of species within functional groups for bivalves (A) and birds (B). Functional group codes defined in Tables S1 and S2.

**
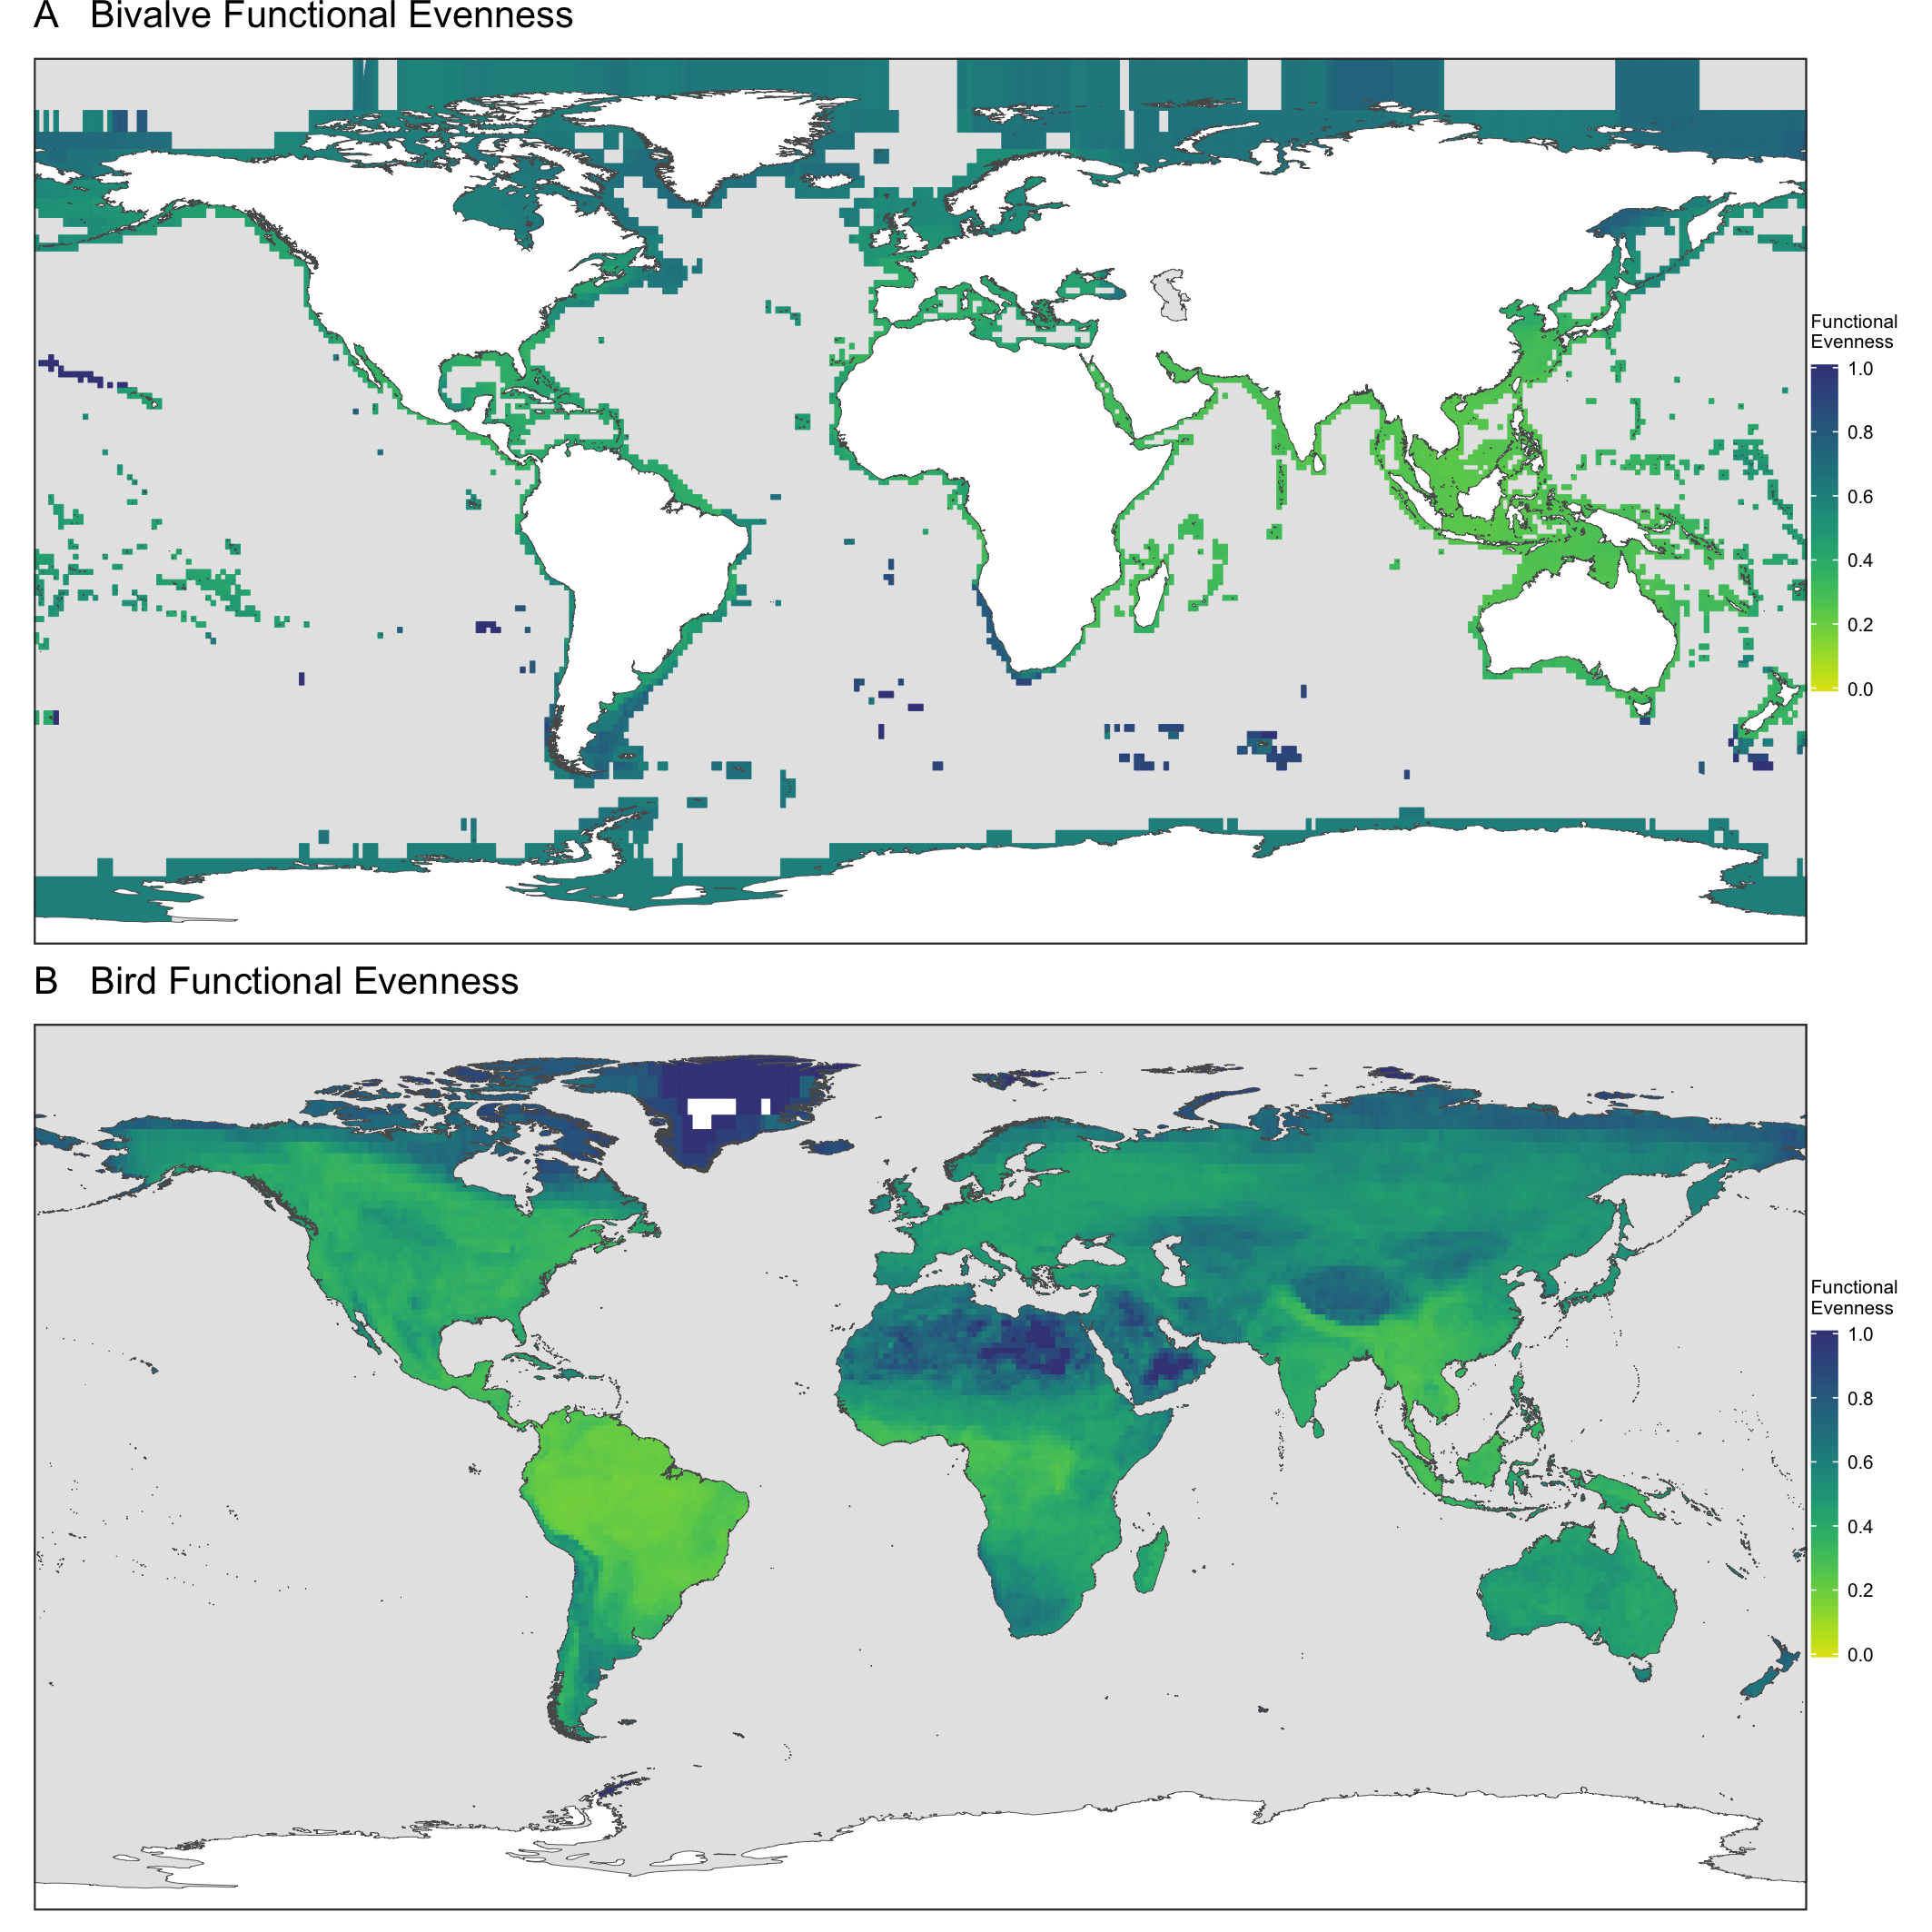
**

**Figure S4.** Global distribution of functional evenness. (A) Bivalve functional evenness is lowest in the tropical Indo-West Pacific, increasing towards either pole. (B) Bird functional evenness is lowest in the Amazon and tropical plains southeast of the Himalayas, increasing towards either pole.

**Figure S5.** Globallatitudinal and longitudinal occurrences of bivalve and bird functional groups in equal-area grid cells. Functional group codes as defined in Tables S1 and S2. (A) Bivalves show a strong nestedness of functional groups with nearly all functional groups spanning tropical latitudes. (B) Birds show a similar highly nested pattern, although with slightly more turnover (see main text Figure 4). (C) Bivalves have slightly more turnover longitudinally in functional groups than they do latitudinally, largely reflecting turnover between the Western Atlantic and the Western Pacific. (D) Longitudinal ranges of bird functional groups are slightly more nested than those of bivalves, but have a relatively higher rate of endemicity in functional groups primarily attributed to the Amazon.

**Figure S6.** Observed functional evenness of bird species in a given latitudinal band are marked with “X.” The gray points and points represent the mean and 95% inner quantile of the resampled tropical assemblages to the species richness of a given latitudinal band.

**Table S1.** Functional groups and their respective numeric codes for bivalves.

| **Functional Group Code** | **Mobility** | **Feeding** | **Attachment to Substrate** | **Position in Substrate** |
| --- | --- | --- | --- | --- |
| 1 | mobile | suspension | unattached | shallow infaunal siphonate |
| 2 | mobile | suspension | unattached | infaunal asiphonate |
| 3 | immobile | suspension | byssate | epifaunal |
| 4 | mobile | suspension | unattached | deep infaunal siphonate |
| 5 | mobile | mixed deposit/suspension | unattached | deep infaunal siphonate |
| 6 | mobile | chemosymbiotic | unattached | deep infaunal siphonate |
| 7 | mobile | suspension | byssate | epifaunal |
| 8 | immobile | suspension | cemented | epifaunal |
| 9 | mobile | subsurface deposit | unattached | shallow infaunal siphonate |
| 10 | mobile | carnivore | unattached | shallow infaunal siphonate |
| 11 | mobile | mixed deposit/suspension | unattached | shallow infaunal siphonate |
| 12 | swimming | suspension | byssate | epifaunal |
| 13 | immobile | suspension | unattached | borer |
| 14 | mobile | subsurface deposit | unattached | infaunal asiphonate |
| 15 | immobile | suspension | byssate | semi infaunal |
| 16 | mobile | surface deposit | unattached | shallow infaunal siphonate |
| 17 | immobile | suspension | byssate | shallow infaunal siphonate |
| 18 | mobile | surface deposit | unattached | deep infaunal siphonate |
| 19 | mobile | suspension | byssate | semi infaunal |
| 20 | mobile | carnivore | byssate | epifaunal |
| 21 | immobile | suspension | byssate | nestler |
| 22 | immobile | suspension | byssate | borer |
| 23 | mobile | suspension | unattached | borer |
| 24 | immobile | suspension | unattached | deep infaunal siphonate |
| 25 | mobile | chemosymbiotic | unattached | shallow infaunal siphonate |
| 26 | mobile | suspension | byssate | infaunal asiphonate |
| 27 | mobile | suspension | byssate | shallow infaunal siphonate |
| 28 | swimming | chemosymbiotic | unattached | deep infaunal siphonate |
| 29 | mobile | photosymbiotic | unattached | semi infaunal |
| 30 | immobile | suspension | byssate | infaunal asiphonate |
| 31 | swimming | suspension | unattached | epifaunal |
| 32 | mobile | suspension | unattached | commensal |
| 33 | mobile | chemosymbiotic | unattached | infaunal asiphonate |
| 34 | swimming | suspension | byssate | nestler |
| 35 | swimming | suspension | unattached | semi infaunal |
| 36 | mobile | subsurface deposit | unattached | deep infaunal siphonate |
| 37 | swimming | suspension | unattached | deep infaunal siphonate |
| 38 | mobile | suspension | unattached | epifaunal |
| 39 | mobile | suspension | byssate | nestler |
| 40 | mobile | suspension | unattached | semi infaunal |
| 41 | immobile | photosymbiotic | byssate | epifaunal |
| 42 | immobile | chemosymbiotic | byssate | epifaunal |
| 43 | immobile | suspension | unattached | epifaunal |
| 44 | immobile | suspension | unattached | nestler |
| 45 | swimming | carnivore | byssate | epifaunal |
| 46 | immobile | suspension | cemented | borer |
| 47 | mobile | suspension | unattached | nestler |
| 48 | mobile | surface deposit | unattached | nestler |
| 49 | mobile | photosymbiotic | byssate | boring |

**Table S2.** Functional groups and their respective numeric codes for birds.

| **Functional Group Code** | **Foraging substrate** | **Feeding** |
| --- | --- | --- |
| 1 | Strictly aquatic, non-marine | Invertebrate prey |
| 2 | Strictly aquatic, pelagic | Invertebrate prey |
| 3 | Semi-aquatic | Invertebrate prey |
| 4 | Ground | Invertebrate prey |
| 5 | Understory | Invertebrate prey |
| 6 | Canopy | Invertebrate prey |
| 7 | Aerial | Invertebrate prey |
| 8 | Upper branches | Invertebrate prey |
| 9 | Ground and understory | Invertebrate prey |
| 12 | Semi-aquatic | Endotherm prey |
| 13 | Ground | Endotherm prey |
| 17 | Upper branches | Endotherm prey |
| 18 | Ground and understory | Endotherm prey |
| 21 | Semi-aquatic | Ectotherm prey |
| 22 | Ground | Ectotherm prey |
| 26 | Upper branches | Ectotherm prey |
| 27 | Ground and understory | Ectotherm prey |
| 28 | Strictly aquatic, non-marine | Piscivores |
| 29 | Strictly aquatic, pelagic | Piscivores |
| 30 | Semi-aquatic | Piscivores |
| 40 | Ground | Scavengers |
| 49 | Ground | Frugivores |
| 50 | Understory | Frugivores |
| 51 | Canopy | Frugivores |
| 53 | Upper branches | Frugivores |
| 54 | Ground and understory | Frugivores |
| 58 | Ground | Nectarivores |
| 59 | Understory | Nectarivores |
| 62 | Upper branches | Nectarivores |
| 63 | Ground and understory | Nectarivores |
| 67 | Ground | Granivores |
| 68 | Understory | Granivores |
| 71 | Upper branches | Granivores |
| 72 | Ground and understory | Granivores |
| 73 | Strictly aquatic, non-marine | Other plants |
| 75 | Semi-aquatic | Other plants |
| 76 | Ground | Other plants |
| 80 | Upper branches | Other plants |
| 81 | Ground and understory | Other plants |
| 82 | Strictly aquatic, non-marine | Inverts + plant materials |
| 84 | Semi-aquatic | Inverts + plant materials |
| 85 | Ground | Inverts + plant materials |
| 86 | Understory | Inverts + plant materials |
| 87 | Canopy | Inverts + plant materials |
| 88 | Aerial | Inverts + plant materials |
| 89 | Upper branches | Inverts + plant materials |
| 90 | Ground and understory | Inverts + plant materials |
| 96 | Canopy | Nectar + inverts |
| 98 | Upper branches | Nectar + inverts |
| 99 | Ground and understory | Nectar + inverts |
| 100 | Strictly aquatic, non-marine | Generalist carnivore |
| 102 | Semi-aquatic | Generalist carnivore |
| 103 | Ground | Generalist carnivore |
| 107 | Upper branches | Generalist carnivore |
| 109 | Strictly aquatic, non-marine | Generalist omnivore |
| 110 | Strictly aquatic, pelagic | Generalist omnivore |
| 111 | Semi-aquatic | Generalist omnivore |
| 112 | Ground | Generalist omnivore |
| 113 | Understory | Generalist omnivore |
| 114 | Canopy | Generalist omnivore |
| 115 | Aerial | Generalist omnivore |
| 116 | Upper branches | Generalist omnivore |
| 117 | Ground and understory | Generalist omnivore |
| 118 | Strictly aquatic, non-marine | Generalist herbivore |
| 120 | Semi-aquatic | Generalist herbivore |
| 121 | Ground | Generalist herbivore |
| 125 | Upper branches | Generalist herbivore |
| 126 | Ground and understory | Generalist herbivore |

**SUPPLEMENTAL REFERENCES**

Baselga A. 2010. Partitioning the turnover and nestedness components of beta diversity. *Global Ecol. Biogeogr.* 19(1):134-143.

Bennett PM, Owens IPF. 2002. Evolutionary Ecology of Birds: Life Histories, Mating Systems, and Extinction. Oxford University Press. Oxford, U.K. 278 p.

Berke SK, Jablonski D, Krug AZ, Valentine JW. 2014 Origination and immigration drive latitudinal gradients in marine functional diversity. *PLoS One* **9**, e101494.

Burin et al. 2016. Omnivory in birds is a macroevolutionary sink. Nature Communic. doi:10.1038/ncomms11250.

Edie SM, Jablonski D, Valentine JW. 2018a. Contrasting responses of functional diversity to major losses in taxonomic diversity. *Proc. Natl. Acad. Sci. USA* 115 (4) 732-737.

del Hoyo J, Elliott A, Sargatal J, Christie DA, Kirwan G. (eds.) 2018. *Handbook of the Birds of the World Alive*. Lynx Edicions, Barcelona. (retrieved from [http://www.hbw.com/](http://www.hbw.com/node/53645)).

Gartrell BD. 2000. The nutritional, morphologic, and physiologic bases of nectarivory in Australian birds. *Journal of Avian Medicine and Surgery*, *14*(2):85-95.

Kissling WD, Sekercioglu CH, Jetz W. 2012. Bird dietary guild richness across latitudes, environments and biogeographic regions. *Global Ecol. Biogeogr.* 21(3):328-340.

Şekercioğlu ÇH, Daily GC, Ehrlich PR. 2004. Ecosystem consequences of bird declines. *Proc. Natl. Acad. Sci. USA* *101*(52):18042-18047.

Wilman H, Belmaker J, Simpson J, de la Rosa C, Rivadeneira MM. Jetz W. 2014. EltonTraits 1.0: Species‐level foraging attributes of the world's birds and mammals. Ecology. 95(7):2027.
